# Supplementary material
Source: publisher site journal article supplement (https://www.spandidos-publications.com/8244/downloadSupplementary)
Supplement: Supplementary file 1 [file downloadSupplementary]

**Table SI.** Antibodies used in the experiments.

| <b>Antibody</b>                                         | <b>Source</b>              | <b>Dilution</b> | <b>Cat. no.</b> |
|---------------------------------------------------------|----------------------------|-----------------|-----------------|
| $\beta$ -TUBULIN                                        | Proteintech Group, Inc.    | 1:25,000        | 80713-1-RR      |
| TAS1R2                                                  | Proteintech Group, Inc.    | 1:1,250         | 29344-1-AP      |
| PLC $\beta$                                             | Proteintech Group, Inc.    | 1:750           | 66668-1-Ig      |
| GANT3                                                   | ABclonal Biotech Co., Ltd. | 1:1,250         | A15982          |
| p-PLC $\beta$                                           | ABclonal Biotech Co., Ltd. | 1:1,250         | AP0837          |
| PKC $\beta$                                             | ABclonal Biotech Co., Ltd. | 1:3,600         | A21241          |
| TAS1R3                                                  | ABclonal Biotech Co., Ltd. | 1:750           | A10157          |
| DGKH                                                    | Affinity Biosciences       | 1:1,250         | AF0611          |
| HRP-conjugated Affinipure<br>Goat Anti-Rabbit IgG (H+L) | Proteintech Group, Inc.    | 1:10,000        | SA00001-2       |
| HRP-conjugated Affinipure<br>Goat Anti-Mouse IgG (H+L)  | Proteintech Group, Inc.    | 1:10,000        | SA00001-1       |

TAS1R, taste 1 receptor member; PLC $\beta$ , phospholipase C beta;GNAT3, G protein subunit alpha transducin 3;p-, phosphorylated; PKC, protein kinase C.

**Table SII.** Primers used in the gene transcription analysis.

| <b>Genes</b>                 | <b>Forward</b>          | <b>Reverse</b>              |
|------------------------------|-------------------------|-----------------------------|
| <i>Gck</i>                   | GCCACAAACATTCCAGAGACAG  | AGAGGGACCTGGGTGGTTTC        |
| <i>G6pc1</i>                 | CTGCTGTGTCTGGTAGGCAA    | CCTGGGTCTCCTTGCCATT         |
| <i>Slc2a2</i>                | TCCTTGGGCCTTACGTGTTC    | CTGGTCGGTTCCTCGGTTTT        |
| <i>Slc5a10</i>               | CCTGTGGTACTGGTGTACGG    | CGATGTTGGTACAGCCCACT        |
| <i>Ehhadh</i>                | ATGGCTGAGTATCTGAGGCTG   | ACCGTATGGTCCAAACTAGCTT      |
| <i>Acot1</i>                 | TGATGGTTTGGAGGTTGGGG    | TGAAACTCCATTCCCAGCCC        |
| <i>Tnfa</i>                  | CCCTCACACTCAGATCATCTTCT | GCTACGACGTGGGCTACAG         |
| <i>Ccl2</i>                  | TTAAAAACCTGGATCGGAACCAA | GCATTAGCTTCAGATTTACGGGT     |
| <i>Il6</i>                   | TAGTCCTTCTACCCCAATTTC   | TTGGTCCTTAGCCACTCCTTC       |
| <i>Il1<math>\beta</math></i> | GCAACTGTTCTGAACTCAACT   | ATCTTTTGGGGTCCGTCAACT       |
| <i>Acaca</i>                 | GATGAACCATCTCCGTTGGC    | GACCCAATTATGAATCGGGAGT<br>G |
| <i>Elovl6</i>                | GAAAAGCAGTTCAACGAGAACG  | AGATGCCGACCACCAAAGATA       |
| <i>Srebf1</i>                | TGACCCGGCTATTCCGTGA     | CTGGGCTGAGCAATACAGTTC       |
| <i>Acox1</i>                 | CCGCCACCTTCAATCCAGAG    | CAAGTTCTCGATTTCTCGACGG      |
| <i>Dgat2</i>                 | GCGCTACTTCCGAGACTACTT   | GGGCCTTATGCCAGGAACT         |
| <i>Cd36</i>                  | ATGGGCTGTGATCGGAACTG    | GTCTTCCAATAAGCATGTCTCC      |
| <i>Pck1</i>                  | TGGAAGGTCGAATGTGTGGG    | CAGTAAACACCCCCATCGCT        |
| <i>Pgm2</i>                  | AGGCCAAAATCGTCCTAGCC    | TCCACTCACCCTGTCTTGC         |
| <i>Gapdh</i>                 | AACTTTGGCATTGTGGAAGGG   | GACACATTGGGGGTAGGAACA       |
